# Supplementary material for: The Influence of Age on Cerebral Tissue Oxygenation in Vasovagal Syncope and Orthostatic Hypotension
Source: MDPI journal article supplement (doi:10.3390/jcm11154302), 2022-07-25
Supplement: s1 [file s1]

## Supplementary Tables

**Table S1.** Medications among patients with vasovagal syncope, orthostatic hypotension and negative HUT patients.

|                          | VVS  | OH    | Negative HUT |
|--------------------------|------|-------|--------------|
| Beta blockers            | 10.1 | 19.8  | 17.1         |
| Loop diuretics           | 0.7  | 7.4   | 3.7          |
| Hydrochlorothiazide      | 2.9  | 3.3   | 2.4          |
| Spironolactone           | 0.7  | 3.3   | 0*           |
| ACE                      | 2.9* | 11.7* | 14.6         |
| ARB                      | 7.2  | 21.5  | 4.9          |
| Alfa blockers            | 0    | 2.5   | 1.2          |
| Calcium channel blockers | 5.8  | 17.4  | 6.1          |
| Antihypotensives         | 0.7  | 6.6   | 2.4          |

Values are presented as percentage values. Abbreviations: VVS=vasovagal syncope, OH=orthostatic hypotension.

ACE=angiotensin converting enzyme, ARB=angiotensin receptor blocker, HUT=head-up tilt. \*n=1 missing.

**Table S2A.** Association between cerebral tissue oxygen saturation, systolic blood pressure and age at examination in vasovagal syncope patients.

| <b>A.</b>               | <b>Beta</b> | <b>p-value</b> |
|-------------------------|-------------|----------------|
| SctO2 supine            | -0.019      | 0.317          |
| SctO2 3 min             | -0.015      | 0.484          |
| SctO2 10 min            | -0.015      | 0.502          |
| SctO2 presyncopal phase | -0.123      | <0.001         |
| SctO2 syncope           | -0.034      | 0.200          |
| SctO2 minimum           | -0.010      | 0.628          |
| Delta presyncope        | 0.104       | <0.001         |
| <b>B.</b>               | <b>Beta</b> | <b>p-value</b> |
| SctO2 supine            | -0.036      | 0.114          |
| SctO2 3 min             | -0.044      | 0.071          |
| SctO2 10 min            | -0.058      | 0.033          |
| SctO2 presyncopal phase | -0.096      | 0.001          |
| SctO2 syncope           | -0.022      | 0.423          |
| SctO2 minimum           | -0.038      | 0.093          |
| Delta presyncope        | 0.026       | 0.315          |
| <b>C.</b>               | <b>Beta</b> | <b>p-value</b> |
| SBP supine              | 0.494       | <0.001         |
| SBP 3 min               | 0.528       | <0.001         |
| SBP 10 min              | 0.601       | <0.001         |
| SBP presyncopal phase   | -0.200      | 0.052          |
| SBP minimum             | 0.488       | <0.001         |
| Delta presyncope        | 0.693       | <0.001         |
| <b>D.</b>               | <b>Beta</b> | <b>p-value</b> |
| SBP supine              | 0.481       | <0.001         |
| SBP 3 min               | 0.536       | <0.001         |
| SBP 10 min              | 0.614       | <0.001         |
| SBP presyncopal phase   | -0.049      | 0.628          |
| Delta presyncope        | 0.507       | <0.001         |

A: Univariable linear regression model including age (independent variable) and SctO2 (dependant variable).

B: Multivariable-adjusted linear regression model including age (independent variable) and SctO2 (dependant variable, adjusted for sex and concurrent systolic blood pressure (supine position or after 3 or 10 min of head up tilt, mean of 45-15 seconds prior to syncope, SBP during syncope, SBP during lowest measured SctO2 prior to reflex activation or delta SBP from supine to presyncope).

C: Univariable linear regression model including age (independent variable) and SBP (dependant variable).

D: Multivariable-adjusted linear regression model including age (independent variable) and SBP (dependant variable, adjusted for sex and concurrent cerebral tissue oxygenation (supine position or after 3 or 10 min of head up tilt, mean of 45-15 seconds prior to syncope, or delta SctO2 from supine to presyncope).

SBP=systolic blood pressure, SctO2=cerebral tissue oxygenation.

**Table S2B.** Association between cerebral tissue oxygen saturation, systolic blood pressure and age at examination in orthostatic hypotension patients.

| <b>A.</b>               | <b>Beta</b> | <b>p-value</b> |
|-------------------------|-------------|----------------|
| SctO2 supine            | -0.043      | 0.024          |
| SctO2 3 min             | -0.058      | 0.004          |
| SctO2 10 min            | -0.081      | <0.001         |
| SctO2 presyncopal phase | -0.200      | <0.001         |
| SctO2 syncope           | -0.071      | 0.051          |
| SctO2 minimum           | -0.089      | <0.001         |
| Delta presyncope        | 0.109       | <0.001         |
| <b>B.</b>               | <b>Beta</b> | <b>p-value</b> |
| SctO2 supine            | -0.067      | 0.005          |
| SctO2 3 min             | -0.078      | 0.001          |
| SctO2 10 min            | -0.097      | <0.001         |
| SctO2 presyncopal phase | -0.203      | <0.001         |
| SctO2 syncope           | -0.079      | 0.057          |
| SctO2 minimum           | -0.112      | <0.001         |
| Delta presyncope        | 0.070       | 0.052          |
| <b>C.</b>               | <b>Beta</b> | <b>p-value</b> |
| SBP supine              | 0.650       | <0.001         |
| SBP 3 min               | 0.382       | <0.001         |
| SBP 10 min              | 0.374       | 0.001          |
| SBP presyncopal phase   | 0.005       | 0.962          |
| SBP minimum             | 0.164       | 0.091          |
| Delta presyncope        | 0.702       | <0.001         |
| <b>D.</b>               | <b>Beta</b> | <b>p-value</b> |
| SBP supine              | 0.741       | <0.001         |
| SBP 3 min               | 0.508       | <0.001         |
| SBP 10 min              | 0.556       | <0.001         |
| SBP presyncopal phase   | -0.044      | 0.777          |
| Delta presyncope        | 0.590       | 0.008          |

A: Univariable linear regression model including age (independent variable) and SctO2 (dependant variable).

B: Multivariable-adjusted linear regression model including age (independent variable) and SctO2 (dependant variable, adjusted for sex and concurrent systolic blood pressure (supine position or after 3 or 10 min of head up tilt, mean of 45-15 seconds prior to syncope, SBP during syncope, SBP during lowest measured SctO2 prior to reflex activation or delta SBP from supine to presyncope).

C: Univariable linear regression model including age (independent variable) and SBP (dependant variable).

D: Multivariable-adjusted linear regression model including age (independent variable) and SBP (dependant variable, adjusted for sex and concurrent cerebral tissue oxygenation (supine position or after 3 or 10 min of head up tilt, mean of 45-15 seconds prior to syncope, or delta SctO2 from supine to presyncope).

SBP=systolic blood pressure, SctO2=cerebral tissue oxygenation.

**Table S2C.** Association between cerebral tissue oxygen saturation, systolic blood pressure and age at examination in patients with negative head-up tilt.

| <b>A.</b>         | <b>Beta</b> | <b>p-value</b> |
|-------------------|-------------|----------------|
| SctO2 supine      | -0.055      | 0.069          |
| SctO2 3 min       | -0.019      | 0.567          |
| SctO2 10 min      | -0.028      | 0.367          |
| SctO2 minimum     | -0.032      | 0.329          |
| Delta minimum     | -0.018      | 0.448          |
| <b>B.</b>         | <b>Beta</b> | <b>p-value</b> |
| SctO2 supine      | -0.085      | 0.010          |
| SctO2 3 min       | -0.057      | 0.121          |
| SctO2 10 min      | -0.056      | 0.100          |
| SctO2 minimum     | -0.046      | 0.164          |
| Delta minimum     | -0.041      | 0.068          |
| <b>C.</b>         | <b>Beta</b> | <b>p-value</b> |
| SBP supine        | 0.429       | <0.001         |
| SBP 3 min         | 0.462       | <0.001         |
| SBP 10 min        | 0.439       | <0.001         |
| SBP minimum       | 0.389       | <0.001         |
| Delta SBP minimum | 0.041       | 0.499          |
| <b>D.</b>         | <b>Beta</b> | <b>p-value</b> |
| SBP supine        | 0.464       | <0.001         |
| SBP 3 min         | 0.472       | <0.001         |
| SBP 10 min        | 0.455       | <0.001         |

A: Univariable linear regression model including age (independent variable) and SctO2 (dependant variable).

B: Multivariable-adjusted linear regression model including age (independent variable) and SctO2 (dependant variable, adjusted for sex and concurrent systolic blood pressure (supine position or after 3 or 10 min of head up tilt, minimum SBP, or delta SBP from supine to minimum value). Delta minimum was defined as the difference in supine value and minimum SctO2 during head up tilt test.

C: Univariable linear regression model including age (independent variable) and SBP (dependant variable).

D: Multivariable-adjusted linear regression model including age (independent variable) and SBP (dependant variable, adjusted for sex and concurrent cerebral tissue oxygenation (supine position or after 3 or 10 min of head up tilt or minimum SctO2. Delta minimum was defined as the difference in supine value and minimum SBP during head up tilt test.

SBP=systolic blood pressure, SctO2=cerebral tissue oxygenation.

**Table S3A.** Systolic blood pressure according to age in vasovagal syncope patients.

|                       | <b>Below 30 years<br/>(n=36)</b> | <b>30-60 years<br/>(n=73)</b> | <b>Above 60 years<br/>(n=30)</b> | <b>p-value</b>      |
|-----------------------|----------------------------------|-------------------------------|----------------------------------|---------------------|
| SBP supine            | 123.4±10.4                       | 128.9±14.0                    | 146.7±17.9                       | <0.001 <sup>α</sup> |
| SBP 3min              | 124.9±10.8                       | 130.9±15.4 <sup>†</sup>       | 150.1±20.9                       | <0.001 <sup>α</sup> |
| SBP 10 min            | 119.6±12.4 <sup>§</sup>          | 128.7±13.9 <sup>‡</sup>       | 147.2±19.0                       | <0.001 <sup>α</sup> |
| SBP presyncopal phase | 85.6±21.8                        | 77.6±19.7                     | 77.6±20.8                        | 0.133               |
| SBP minimum           | 111.7±17.8*                      | 120.2±12.1*                   | 134.8±17.8                       | <0.001              |
| SBP delta presyncope  | 37.8±20.0                        | 51.3±21.9                     | 69.1±22.6                        | <0.001              |
| SBP delta minimum     | 11.6±16.9*                       | 8.6±8.7*                      | 11.9±10.4                        | 0.297               |

Continuous variables are expressed as mean ± standard deviation of the mean. P-values are from one way-ANOVA, unless otherwise indicated, for differences in mean SBP in patients below 30 years, between 30-60 years and over 60 years of age. Delta presyncope was defined as the difference in supine value to 45-15 seconds prior to syncope. Delta minimum was defined as the difference in supine value and minimum value prior to reflex activation. \*n=1, <sup>†</sup>n=3, <sup>‡</sup>n=5, <sup>§</sup>n=6 missing. SBP=systolic blood pressure, SctO2=cerebral tissue oxygenation.

α = p-values from Welch test.

**Table S3B.** Systolic blood pressure according to age in vasovagal syncope patients.

|                              |       |       | <b>P-value</b>      |
|------------------------------|-------|-------|---------------------|
| <b>SBP supine</b>            | <30   | 30-60 | 0.063 <sup>α</sup>  |
|                              |       | >60   | <0.001 <sup>α</sup> |
|                              | 30-60 | <30   | 0.063 <sup>α</sup>  |
|                              |       | >60   | <0.001 <sup>α</sup> |
|                              | >60   | <30   | <0.001 <sup>α</sup> |
|                              |       | 30-60 | <0.001 <sup>α</sup> |
| <b>SBP 3 min</b>             | <30   | 30-60 | 0.057 <sup>α</sup>  |
|                              |       | >60   | <0.001 <sup>α</sup> |
|                              | 30-60 | <30   | 0.057 <sup>α</sup>  |
|                              |       | >60   | <0.001 <sup>α</sup> |
|                              | >60   | <30   | <0.001 <sup>α</sup> |
|                              |       | 30-60 | <0.001 <sup>α</sup> |
| <b>SBP 10 min</b>            | <30   | 30-60 | 0.006 <sup>α</sup>  |
|                              |       | >60   | <0.001 <sup>α</sup> |
|                              | 30-60 | <30   | 0.006 <sup>α</sup>  |
|                              |       | >60   | <0.001 <sup>α</sup> |
|                              | >60   | <30   | <0.001 <sup>α</sup> |
|                              |       | 30-60 | <0.001 <sup>α</sup> |
| <b>SBP presyncopal phase</b> | <30   | 30-60 | 0.135               |
|                              |       | >60   | 0.257               |
|                              | 30-60 | <30   | 0.135               |
|                              |       | >60   | 1.000               |
|                              | >60   | <30   | 0.257               |
|                              |       | 30-60 | 1.000               |
| <b>SBP minimum</b>           | <30   | 30-60 | 0.020               |

|                             |       |       |        |
|-----------------------------|-------|-------|--------|
|                             |       | >60   | <0.001 |
|                             | 30-60 | <30   | 0.020  |
|                             |       | >60   | <0.001 |
|                             | >60   | <30   | <0.001 |
|                             |       | 30-60 | <0.001 |
| <b>SBP delta presyncope</b> | <30   | 30-60 | 0.007  |
|                             |       | >60   | <0.001 |
|                             | 30-60 | <30   | 0.007  |
|                             |       | >60   | 0.001  |
|                             | >60   | <30   | <0.001 |
|                             |       | 30-60 | 0.001  |
| <b>SBP delta minimum</b>    | <30   | 30-60 | 0.429  |
|                             |       | >60   | 0.995  |
|                             | 30-60 | <30   | 0.429  |
|                             |       | >60   | 0.404  |
|                             | >60   | <30   | 0.995  |
|                             |       | 30-60 | 0.404  |

P-values are from two way-ANOVA with Tukey's test, unless otherwise indicated, for differences in mean SBP in patients below 30 years, between 30-60 years and over 60 years of age. Delta presyncope was defined as the difference in supine value to 45-15 seconds prior to syncope. Delta minimum was defined as the difference in supine value and minimum value prior to reflex activation. SBP=systolic blood pressure, HUT=head-up tilt test.  $\alpha$  = p-values from Games-Howell comparisons post hoc test.

**Table S4A. Systolic blood pressure according to age in orthostatic hypotension patients.**

|                       | <b>Below 30 years<br/>(n=13)</b> | <b>30-60 years<br/>(n=32)</b> | <b>Above 60<br/>years (n=76)</b> | <b>p-value</b>      |
|-----------------------|----------------------------------|-------------------------------|----------------------------------|---------------------|
| SBP supine            | 116.1±13.9                       | 132.9±13.7                    | 150.3±22.0                       | <0.001 <sup>α</sup> |
| SBP 3min              | 112.6±14.8*                      | 122.0±10.4                    | 131.9±25.5*                      | 0.002 <sup>α</sup>  |
| SBP 10 min            | 103.5±16.6†                      | 112.0±15.8†                   | 121.6±24.4§                      | 0.011 <sup>α</sup>  |
| SBP presyncopal phase | 74.6±13.1‡                       | 70.5±16.0                     | 73.0±13.1#                       | 0.810               |
| SBP minimum           | 91.5±11.6                        | 99.6±11.8                     | 99.1±24.0*                       | 0.105 <sup>α</sup>  |
| SBP delta presyncope  | 41.0±14.2‡                       | 61.8±14.7                     | 77.7±28.7#                       | 0.001 <sup>α</sup>  |
| SBP delta minimum     | 24.6±8.2                         | 33.3±13.4                     | 51.5±22.0*                       | <0.001 <sup>α</sup> |

Continuous variables are expressed as mean ± standard deviation of the mean. P-values are from one way-ANOVA or Welch test, unless otherwise indicated, for differences in mean SBP in patients below 30 years, between 30-60 years and over 60 years of age. Delta presyncope was defined as the difference in supine value to 45-15 seconds prior to syncope. Delta minimum was defined as the difference in supine value and minimum value prior to reflex activation. \*n=1, †n=3, ‡n=6, §n=8, ||n=20, #n=52 missing. SBP=systolic blood pressure. <sup>α</sup> = p-values from Welch test.



**Table S4B.** Systolic blood pressure according to age in orthostatic hypotension patients.

|                              |       |       | P-value             |
|------------------------------|-------|-------|---------------------|
| <b>SBP supine</b>            | <30   | 30-60 | 0.004 <sup>α</sup>  |
|                              |       | >60   | <0.001 <sup>α</sup> |
|                              | 30-60 | <30   | 0.004 <sup>α</sup>  |
|                              |       | >60   | <0.001 <sup>α</sup> |
|                              | >60   | <30   | <0.001 <sup>α</sup> |
|                              |       | 30-60 | <0.001 <sup>α</sup> |
| <b>SBP 3 min</b>             | <30   | 30-60 | 0.138 <sup>α</sup>  |
|                              |       | >60   | 0.003 <sup>α</sup>  |
|                              | 30-60 | <30   | 0.138 <sup>α</sup>  |
|                              |       | >60   | 0.014 <sup>α</sup>  |
|                              | >60   | <30   | 0.003 <sup>α</sup>  |
|                              |       | 30-60 | 0.014 <sup>α</sup>  |
| <b>SBP 10 min</b>            | <30   | 30-60 | 0.357 <sup>α</sup>  |
|                              |       | >60   | 0.022 <sup>α</sup>  |
|                              | 30-60 | <30   | 0.357 <sup>α</sup>  |
|                              |       | >60   | 0.060 <sup>α</sup>  |
|                              | >60   | <30   | 0.022 <sup>α</sup>  |
|                              |       | 30-60 | 0.060 <sup>α</sup>  |
| <b>SBP presyncopal phase</b> | <30   | 30-60 | 0.815               |
|                              |       | >60   | 0.961               |
|                              | 30-60 | <30   | 0.815               |
|                              |       | >60   | 0.873               |
|                              | >60   | <30   | 0.961               |
|                              |       | 30-60 | 0.873               |
| <b>SBP minimum</b>           | <30   | 30-60 | 0.107 <sup>α</sup>  |

|                             |       |       |                 |
|-----------------------------|-------|-------|-----------------|
|                             |       | >60   | 0.185 $\alpha$  |
|                             | 30-60 | <30   | 0.107 $\alpha$  |
|                             |       | >60   | 0.988 $\alpha$  |
|                             | >60   | <30   | 0.185 $\alpha$  |
|                             |       | 30-60 | 0.988 $\alpha$  |
| <b>SBP delta presyncope</b> | <30   | 30-60 | 0.024 $\alpha$  |
|                             |       | >60   | <0.001 $\alpha$ |
|                             | 30-60 | <30   | 0.024 $\alpha$  |
|                             |       | >60   | 0.087 $\alpha$  |
|                             | >60   | <30   | <0.001 $\alpha$ |
|                             |       | 30-60 | 0.087 $\alpha$  |
| <b>SBP delta minimum</b>    | <30   | 30-60 | 0.033 $\alpha$  |
|                             |       | >60   | <0.001 $\alpha$ |
|                             | 30-60 | <30   | 0.033 $\alpha$  |
|                             |       | >60   | <0.001 $\alpha$ |
|                             | >60   | <30   | <0.001 $\alpha$ |
|                             |       | 30-60 | <0.001 $\alpha$ |

P-values are from two way-ANOVA with Tukey's post hoc test, unless otherwise indicated, for differences in mean SBP in patients below 30 years, between 30-60 years and over 60 years of age. Delta presyncope was defined as the difference in supine value to 45-15 seconds prior to syncope. Delta minimum was defined as the difference in supine value and minimum value prior to reflex activation. SBP=systolic blood pressure, HUT=head-up tilt test.  $\alpha$  = p-values from Games-Howell comparisons post hoc test.

**Table S5A.** Cerebral tissue oxygenation during HUT according to age in vasovagal syncope patients.

|                                |       |       | <b>P-value</b> |
|--------------------------------|-------|-------|----------------|
| <b>SctO2 supine</b>            | <30   | 30-60 | 0.242          |
|                                |       | >60   | 0.833          |
|                                | 30-60 | <30   | 0.242          |
|                                |       | >60   | 0.666          |
|                                | >60   | <30   | 0.833          |
|                                |       | 30-60 | 0.666          |
| <b>SctO2 3 min</b>             | <30   | 30-60 | 0.950          |
|                                |       | >60   | 0.992          |
|                                | 30-60 | <30   | 0.950          |
|                                |       | >60   | 0.988          |
|                                | >60   | <30   | 0.992          |
|                                |       | 30-60 | 0.988          |
| <b>SctO2 10 min</b>            | <30   | 30-60 | 0.967          |
|                                |       | >60   | 0.988          |
|                                | 30-60 | <30   | 0.967          |
|                                |       | >60   | 0.905          |
|                                | >60   | <30   | 0.988          |
|                                |       | 30-60 | 0.905          |
| <b>SctO2 presyncopal phase</b> | <30   | 30-60 | 0.147          |
|                                |       | >60   | 0.006          |
|                                | 30-60 | <30   | 0.147          |
|                                |       | >60   | 0.175          |
|                                | >60   | <30   | 0.006          |
|                                |       | 30-60 | 0.175          |

|                               |       |       |                    |
|-------------------------------|-------|-------|--------------------|
| <b>SctO2 syncope</b>          | <30   | 30-60 | 0.853              |
|                               |       | >60   | 0.949              |
|                               | 30-60 | <30   | 0.853              |
|                               |       | >60   | 0.987              |
|                               | >60   | <30   | 0.949              |
|                               |       | 30-60 | 0.987              |
| <b>SctO2 minimum</b>          | <30   | 30-60 | 0.998              |
|                               |       | >60   | 0.976              |
|                               | 30-60 | <30   | 0.998              |
|                               |       | >60   | 0.981              |
|                               | >60   | <30   | 0.976              |
|                               |       | 30-60 | 0.981              |
| <b>SctO2 delta presyncope</b> | <30   | 30-60 | 0.563              |
|                               |       | >60   | 0.003              |
|                               | 30-60 | <30   | 0.563              |
|                               |       | >60   | 0.015              |
|                               | >60   | <30   | 0.003              |
|                               |       | 30-60 | 0.015              |
| <b>SctO2 delta syncope</b>    | <30   | 30-60 | 0.824 <sup>α</sup> |
|                               |       | >60   | 0.993 <sup>α</sup> |
|                               | 30-60 | <30   | 0.824 <sup>α</sup> |
|                               |       | >60   | 0.808 <sup>α</sup> |
|                               | >60   | <30   | 0.993 <sup>α</sup> |
|                               |       | 30-60 | 0.808 <sup>α</sup> |
| <b>SctO2 delta minimum</b>    | <30   | 30-60 | 0.090 <sup>α</sup> |
|                               |       | >60   | 0.566 <sup>α</sup> |
|                               | 30-60 | <30   | 0.090 <sup>α</sup> |
|                               |       | >60   | 0.586 <sup>α</sup> |

|  |     |       |                |
|--|-----|-------|----------------|
|  | >60 | <30   | 0.566 $\alpha$ |
|  |     | 30-60 | 0.586 $\alpha$ |

P-values are from two way-ANOVA with Tukey's test, unless otherwise indicated, differences in mean SctO2 in patients below 30 years, between 30-60 years and over 60 years of age. Delta presyncope was defined as the difference in supine value to 45-15 seconds prior to syncope. Delta syncope was defined as the difference in supine value and lowest measured SctO2 during syncope. Delta minimum was defined as the difference in supine value and minimum value prior to reflex activation. HUT=head-up tilt test, SctO2=cerebral tissue oxygenation.

$\alpha$  = p-values from Games-Howell comparisons post hoc test.

**Table S5B.** Cerebral tissue oxygenation during HUT according to age in orthostatic hypotension patients.

|                                |       |       | <b>P-value</b> |
|--------------------------------|-------|-------|----------------|
| <b>SctO2 supine</b>            | <30   | 30-60 | 0.575          |
|                                |       | >60   | 0.111          |
|                                | 30-60 | <30   | 0.575          |
|                                |       | >60   | 0.392          |
|                                | >60   | <30   | 0.111          |
|                                |       | 30-60 | 0.392          |
| <b>SctO2 3 min</b>             | <30   | 30-60 | 0.614          |
|                                |       | >60   | 0.085          |
|                                | 30-60 | <30   | 0.614          |
|                                |       | >60   | 0.230          |
|                                | >60   | <30   | 0.085          |
|                                |       | 30-60 | 0.230          |
| <b>SctO2 10 min</b>            | <30   | 30-60 | 0.635          |
|                                |       | >60   | 0.010          |
|                                | 30-60 | <30   | 0.635          |
|                                |       | >60   | 0.009          |
|                                | >60   | <30   | 0.010          |
|                                |       | 30-60 | 0.009          |
| <b>SctO2 presyncopal phase</b> | <30   | 30-60 | 0.032          |
|                                |       | >60   | <0.001         |
|                                | 30-60 | <30   | 0.032          |
|                                |       | >60   | 0.049          |
|                                | >60   | <30   | <0.001         |
|                                |       | 30-60 | 0.049          |

|                               |       |       |       |
|-------------------------------|-------|-------|-------|
| <b>SctO2 syncope</b>          | <30   | 30-60 | 0.319 |
|                               |       | >60   | 0.187 |
|                               | 30-60 | <30   | 0.319 |
|                               |       | >60   | 0.977 |
|                               | >60   | <30   | 0.187 |
|                               |       | 30-60 | 0.977 |
| <b>SctO2 minimum</b>          | <30   | 30-60 | 0.708 |
|                               |       | >60   | 0.006 |
|                               | 30-60 | <30   | 0.708 |
|                               |       | >60   | 0.004 |
|                               | >60   | <30   | 0.006 |
|                               |       | 30-60 | 0.004 |
| <b>SctO2 delta presyncope</b> | <30   | 30-60 | 0.188 |
|                               |       | >60   | 0.003 |
|                               | 30-60 | <30   | 0.188 |
|                               |       | >60   | 0.151 |
|                               | >60   | <30   | 0.003 |
|                               |       | 30-60 | 0.151 |
| <b>SctO2 delta syncope</b>    | <30   | 30-60 | 0.960 |
|                               |       | >60   | 0.923 |
|                               | 30-60 | <30   | 0.960 |
|                               |       | >60   | 0.686 |
|                               | >60   | <30   | 0.923 |
|                               |       | 30-60 | 0.686 |
| <b>SctO2 delta minimum</b>    | <30   | 30-60 | 0.999 |
|                               |       | >60   | 0.181 |
|                               | 30-60 | <30   | 0.999 |
|                               |       | >60   | 0.029 |

|  |     |       |       |
|--|-----|-------|-------|
|  | >60 | <30   | 0.181 |
|  |     | 30-60 | 0.029 |

P-values are from two way-ANOVA with Tukey's multiple comparisons post hoc test for differences in mean SctO2 in patients below 30 years, between 30-60 years and over 60 years of age. Delta presyncope was defined as the difference in supine value to 45-15 seconds prior to syncope. Delta syncope was defined as the difference in supine value and lowest measured SctO2 during syncope. Delta minimum was defined as the difference in supine value and minimum value prior to reflex activation. HUT=head-up tilt test, SctO2=cerebral tissue oxygenation.



**Table S5C.** Cerebral tissue oxygenation according to age in negative head-up tilt tests.

|                            |       |       | <b>P-value</b> |
|----------------------------|-------|-------|----------------|
| <b>SctO2 supine</b>        | <30   | 30-60 | 0.588          |
|                            |       | >60   | 0.207          |
|                            | 30-60 | <30   | 0.588          |
|                            |       | >60   | 0.572          |
|                            | >60   | <30   | 0.207          |
|                            |       | 30-60 | 0.572          |
| <b>SctO2 3 min</b>         | <30   | 30-60 | 0.980          |
|                            |       | >60   | 0.848          |
|                            | 30-60 | <30   | 0.980          |
|                            |       | >60   | 0.901          |
|                            | >60   | <30   | 0.848          |
|                            |       | 30-60 | 0.901          |
| <b>SctO2 10 min</b>        | <30   | 30-60 | 0.998          |
|                            |       | >60   | 0.665          |
|                            | 30-60 | <30   | 0.998          |
|                            |       | >60   | 0.638          |
|                            | >60   | <30   | 0.665          |
|                            |       | 30-60 | 0.638          |
| <b>SctO2 minimum</b>       | <30   | 30-60 | 0.980          |
|                            |       | >60   | 0.805          |
|                            | 30-60 | <30   | 0.980          |
|                            |       | >60   | 0.649          |
|                            | >60   | <30   | 0.805          |
|                            |       | 30-60 | 0.649          |
| <b>SctO2 delta minimum</b> | <30   | 30-60 | 0.302          |

|  |       |       |       |
|--|-------|-------|-------|
|  |       | >60   | 0.540 |
|  | 30-60 | <30   | 0.302 |
|  |       | >60   | 0.980 |
|  | >60   | <30   | 0.540 |
|  |       | 30-60 | 0.980 |

P-values are from two way-ANOVA with Tukey's test for differences in mean SctO2 in patients below 30 years, between 30-60 years and over 60 years of age. Delta minimum was defined as the difference in supine value and minimum value prior to reflex activation. SctO2=cerebral tissue oxygenation.

**Table S6.** Cerebral tissue oxygenation according to age in negative head-up tilt tests.

|                     | Below 30 years<br>(n=23) | 30-60 years<br>(n=41) | Above 60 years<br>(n=18) | p-value |
|---------------------|--------------------------|-----------------------|--------------------------|---------|
| SctO2 supine        | 72.8±4.8†                | 71.5±4.5              | 71.1±5.5                 | 0.236   |
| SctO2 3min          | 69.7±5.5                 | 69.5±5.4              | 68.8±6.0                 | 0.855   |
| SctO2 10 min        | 70.0±5.2                 | 69.9±5.0              | 68.6±5.5                 | 0.619   |
| SctO2 minimum       | 66.0±5.5†                | 66.2±4.8              | 64.9±5.7*                | 0.672   |
| SctO2 delta minimum | 6.8±3.2‡                 | 5.3±3.6               | 5.5±4.3*                 | 0.322   |

Continuous variables are expressed as mean ± standard deviation of the mean. P-values are from one way-ANOVA for differences in mean SctO2 in patients below 30 years, between 30-60 years and over 60 years of age. Delta minimum was defined as the difference in supine value and minimum value prior to reflex activation. \*n=1, †n=2, ‡n=3 missing. SctO2=cerebral tissue oxygenation.

**Table S7.** Proportion of smokers according to age.

|                          | <30 years | 30-60 years | >60 years | p-value |
|--------------------------|-----------|-------------|-----------|---------|
| VVS smokers (%)          | 6(16.7)   | 8(11.0)     | 1(3.3)    | 0.756   |
| OH smokers (%)           | 2(15.4)   | 6(18.8)     | 10(13.2)  | 0.220   |
| Negative HUT smokers (%) | 9(39.1)   | 12(29.3)    | 1(5.9)    | 0.059*  |
| Total smokers (%)        | 17(23.6)  | 26(17.8)    | 12(9.8)   | 0.031*  |

Data is defined as number of patients (percentage). P-values are from Chi-2 test. \*N=1 missing. Abbreviations:

VVS, vasovagal syncope. OH, orthostatic hypotension. HUT, head-up tilt test.

**Table S8.** Association between smoking and supine cerebral tissue oxygenation among VVS, OH and negative HUT patients.

|              | Smoker | Non-smoker | p-value |
|--------------|--------|------------|---------|
| Scto2 supine | 70.5   | 71.4       | 0.156*  |

Data is defined as mean supine SctO2 for VVS, OH and negative HUT patients (total=342 patients). P-values are from independent samples t-test. \*N=3 missing. Abbreviations: SctO2, cerebral tissue oxygenation. VVS, vasovagal syncope. OH, orthostatic hypotension. HUT, head-up tilt test.
